# Supplementary material for: F-Specific RNA Bacteriophage Transport in Stream Water: Hydro-Meteorological Controls and Association with Suspended Solids
Source: MDPI journal article supplement (doi:10.3390/w13162250), 2021-08-18
Supplement: s1 [file s1]

## Supplementary material

**Table S1.** Cross section variability of suspended solids and F-specific RNA bacteriophage (FRNAPH; limit of detection, LOD = 0.05 PFU/L) concentrations during three sampling days (03/03/2015, 11/03/2015 and 30/03/2015) at the Orne at Beth sampling site. Samples 1–2 were collected from the water surface (left and right), Samples 3–4 at 1.5–2 m below the water surface (left and right) and Samples 5–6 at 3–4 m below the water surface (left and right). Samples were collected using a telescopic sampling rod with a container at the lower end. The container was closed and opened at the desired water depth for sampling. CI: confidence interval.

|          | Suspended solid concentration<br>(mg/L) |            |            | FRNAPH concentrations<br>(PFU/mL) |       |        |            |       |        |            |       |        |
|----------|-----------------------------------------|------------|------------|-----------------------------------|-------|--------|------------|-------|--------|------------|-------|--------|
|          | 03/03/2015                              | 11/03/2015 | 30/03/2015 | 03/03/2015                        |       |        | 11/03/2015 |       |        | 30/03/2015 |       |        |
|          |                                         |            |            | Mean                              | CI 5% | CI 95% | Mean       | CI 5% | CI 95% | Mean       | CI 5% | CI 95% |
| Sample 1 | 83                                      | NA         | 5          | 0.05                              | 0.00  | 0.28   | 0.05       | <LOD  | <LOD   | 1.60       | 1.09  | 2.26   |
| Sample 2 | 78                                      | NA         | 5          | 0.05                              | 0.00  | 0.28   | 0.15       | 0.03  | 0.44   | 0.93       | 0.51  | 1.57   |
| Sample 3 | 69                                      | NA         | 4          | 0.05                              | 0.00  | 0.28   | 0.05       | 0.00  | 0.28   | 1.45       | 0.97  | 2.08   |
| Sample 4 | 89                                      | NA         | 5          | 0.05                              | 0.00  | 0.28   | 0.05       | <LOD  | <LOD   | 1.65       | 1.14  | 2.32   |
| Sample 5 | 83                                      | NA         | 5          | 0.20                              | 0.05  | 0.51   | 0.10       | 0.01  | 0.36   | 1.93       | 1.29  | 2.78   |
| Sample 6 | 94                                      | NA         | 5          | 0.10                              | 0.01  | 0.36   | 0.15       | 0.03  | 0.44   | 1.20       | 0.71  | 1.90   |

**Table S2.** F-specific RNA bacteriophage (FRNAPH) concentrations (limit of detection, LOD = 4 PFU/mL) and concentration of genome copies of FRNAPH I, II, III and IV (positive but not quantifiable, NQ) measured in the riverbank sediment core (§Section 2.2).

[illegible]
